# Supplementary material for: Effect of partial preferential orientation and distortions in octahedral clusters on the photoluminescence properties of FeWO4 nanocrystals
Source: Royal Society of Chemistry journal article supplement (doi:10.1039/c2ce25771h), 2012-01-01
Supplement: c2ce25771h.pdf [file c2ce25771h.pdf]

## Effect of partial preferential orientation and distortions in octahedral clusters on the photoluminescence properties of FeWO<sub>4</sub> nanocrystals

M.A.P. Almeida<sup>a</sup>, L.S. Cavalcante<sup>b\*</sup>, C. Morila-Santos<sup>c</sup>, C.J. Dalmaschio<sup>a</sup>, S. Rajagopal<sup>e</sup>, M. Siu Li<sup>d</sup> and E. Longo<sup>a,b</sup>

<sup>a</sup>LIEC, Department of Chemistry, Federal University of São Carlos, C. Postal 676, Rod. Washington Luis, Km 235, 13565-905, São Carlos, SP, Brazil. E-mail: laeciosc@bol.com.br

<sup>b</sup>INCTMN, Institute of Chemistry, Unesp, 14800-900, Araraquara, SP, Brazil.

<sup>c</sup>MAv –DF-Universidade Estadual, Paulista, C. Postal 473, 17033-360, Bauru, SP, Brazil.

<sup>d</sup>IFSC-Universidade de São Paulo, 13560-970, São Carlos-SP, Brazil

<sup>e</sup>Department of Chemistry Engineering and Division of Energy System Research, Ajou University, San, Woncheon Dong, Yeontong-Gu, Suwon 443-749, Republic of Korea.

### Electronic Supplementary Information

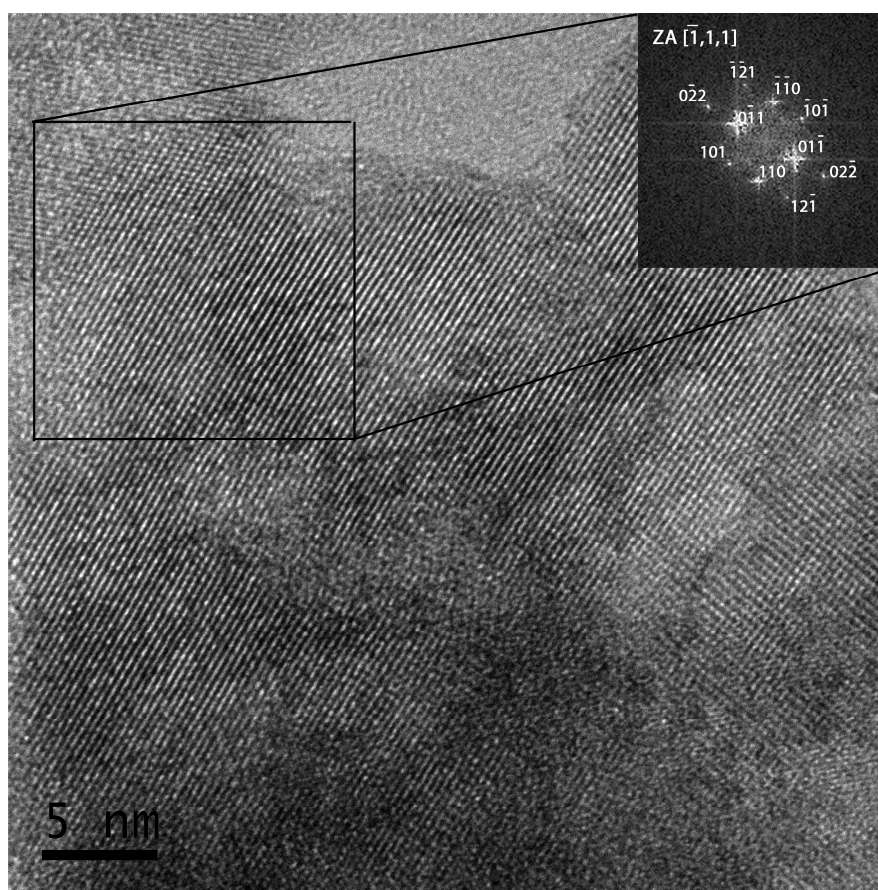

**Fig. SI** - HR-TEM image and FFT patterns of FeWO<sub>4</sub> nanocrystals obtained at 170°C for 45 min with PEG-200 non-ionic surfactant.
